# Supplementary material
Source: PubMed Central journal article supplement (PMC1994263)

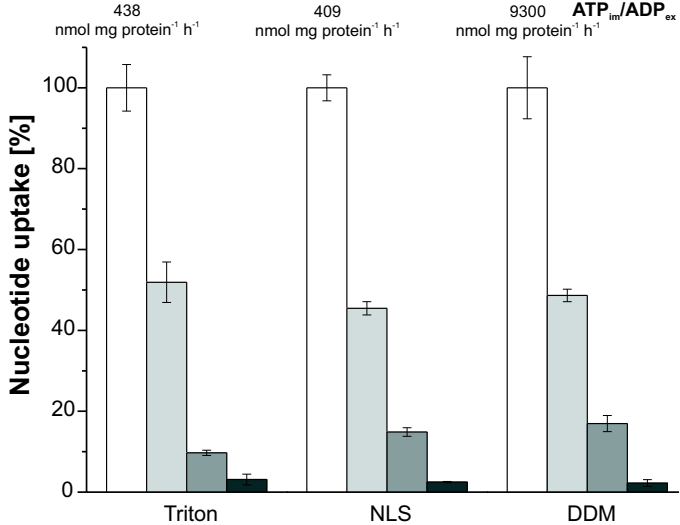

**Supplement Figure 1.**

Supplement: pbio.0050231.sg001.pdf [file pbio.0050231.sg001.pdf]

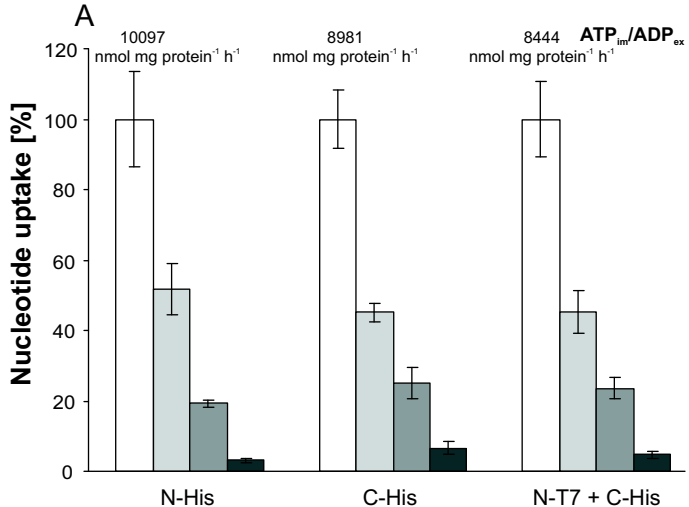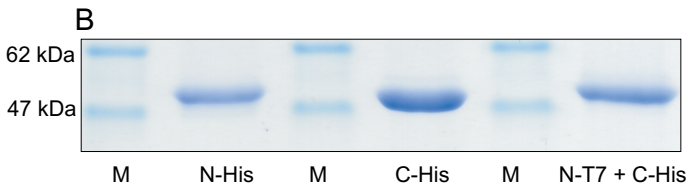

**Supplement Figure 2.**

Supplement: pbio.0050231.sg002.pdf [file pbio.0050231.sg002.pdf]
